# Supplementary material
Source: PubMed Central journal article supplement (PMC4356022)
Supplement: NIHMS667193-supplement-Web_table_1.pdf [file NIHMS667193-supplement-Web_table_1.pdf]

Web table 1. Complete case analysis using unimputed waist and hip measures compared with analyses among women who used a tape measure and multiple imputation analysis

|                            | Total<br>N (%) <sup>a</sup> | Complete Case <sup>a,b</sup><br>HR [95% CI] | Total<br>N (%) <sup>a</sup> | Used a<br>measuring tape <sup>b</sup><br>HR [95% CI] | Total<br>N (%) <sup>a</sup> | Imputed (5<br>datasets)<br>HR [95% CI] <sup>b</sup> |
|----------------------------|-----------------------------|---------------------------------------------|-----------------------------|------------------------------------------------------|-----------------------------|-----------------------------------------------------|
| <b>Waist circumference</b> |                             |                                             |                             |                                                      |                             |                                                     |
| <75 cm                     | 586 (30.5)                  | 1.00 [Reference]                            | 565 (30.6)                  | 1.00 [Reference]                                     | 1309 (25.5)                 | 1.00 [Reference]                                    |
| 75-79 cm                   | 459 (23.9)                  | 0.98 [0.72, 1.34]                           | 438 (23.7)                  | 1.01 [0.74, 1.39]                                    | 1179 (23.0)                 | 0.92 [0.73, 1.16]                                   |
| 80-86 cm                   | 408 (21.3)                  | 0.79 [0.56, 1.12]                           | 397 (21.5)                  | 0.80 [0.57, 1.13]                                    | 1174 (22.9)                 | 0.82 [0.65, 1.03]                                   |
| ≥87 cm                     | 466 (24.3)                  | 0.92 [0.67, 1.28]                           | 447 (24.2)                  | 0.87 [0.63, 1.22]                                    | 1470 (28.6)                 | 0.97 [0.75, 1.25]                                   |
| <b>Waist-to-hip ratio</b>  |                             |                                             |                             |                                                      |                             |                                                     |
| <0.75                      | 416 (21.7)                  | 1.00 [Reference]                            | 391 (21.2)                  | 1.00 [Reference]                                     | 1090 (21.2)                 | 1.00 [Reference]                                    |
| 0.75-0.79                  | 540 (28.1)                  | 0.77 [0.56, 1.06]                           | 521 (28.2)                  | 0.76 [0.55, 1.06]                                    | 1251 (24.4)                 | 0.85 [0.67, 1.06]                                   |
| 0.80-0.84                  | 455 (23.7)                  | 0.66 [0.47, 0.94]                           | 443 (24.0)                  | 0.62 [0.43, 0.89]                                    | 1247 (24.3)                 | 0.76 [0.58, 1.00]                                   |
| ≥0.85                      | 508 (26.5)                  | 0.83 [0.60, 1.16]                           | 492 (26.6)                  | 0.80 [0.57, 1.11]                                    | 1544 (30.1)                 | 0.81 [0.63, 1.05]                                   |

<sup>a</sup> From first imputation dataset

<sup>b</sup> Adjusted for maternal age, physical activity, caffeine consumption, parity, vocational training, alcohol consumption, and smoking
