# Supplementary material
Source: PubMed Central journal article supplement (PMC4356022)
Supplement: NIHMS667193-supplement-Web_table_2.pdf [file NIHMS667193-supplement-Web_table_2.pdf]

Web Table 2. Hazard ratios for the association between body size and SAB, stratified by time to pregnancy, parity, maternal age, and menstrual cycle regularity

| Body Size Characteristics            | N SAB <sup>a</sup> | Total GWs <sup>a</sup> | TTP <6 months <sup>b</sup> | N SAB <sup>a</sup> | Total GWs <sup>a</sup> | TTP ≥6 months <sup>b</sup> |
|--------------------------------------|--------------------|------------------------|----------------------------|--------------------|------------------------|----------------------------|
| Body mass index (kg/m <sup>2</sup> ) |                    |                        |                            |                    |                        |                            |
| <20                                  | 50                 | 6617                   | 1.08 [0.79, 1.48]          | 58                 | 8375                   | 0.91 [0.68, 1.23]          |
| 20-24                                | 177                | 25128                  | 1.00 [Reference]           | 208                | 27831                  | 1.00 [Reference]           |
| 25-29                                | 43                 | 8704                   | 0.70 [0.50, 0.98]          | 92                 | 11990                  | 1.02 [0.80, 1.31]          |
| ≥30                                  | 46                 | 3939                   | 1.65 [1.18, 2.31]          | 58                 | 7695                   | 1.02 [0.76, 1.38]          |
| Waist circumference                  |                    |                        |                            |                    |                        |                            |
| <75 cm                               | 86                 | 11768                  | 1.00 [Reference]           | 113                | 13732                  | 1.00 [Reference]           |
| 75-79 cm                             | 79                 | 11414                  | 0.90 [0.64, 1.26]          | 86                 | 11706                  | 0.95 [0.68, 1.35]          |
| 80-86 cm                             | 65                 | 10379                  | 0.80 [0.55, 1.17]          | 85                 | 12736                  | 0.84 [0.62, 1.15]          |
| ≥87 cm                               | 86                 | 10827                  | 0.99 [0.71, 1.39]          | 132                | 17717                  | 0.97 [0.68, 1.40]          |
| Waist to hip ratio                   |                    |                        |                            |                    |                        |                            |
| <0.75                                | 85                 | 10048                  | 1.00 [Reference]           | 101                | 10976                  | 1.00 [Reference]           |
| 0.75-0.79                            | 78                 | 11325                  | 0.80 [0.56, 1.12]          | 97                 | 12991                  | 0.89 [0.64, 1.23]          |
| 0.80-0.84                            | 73                 | 11209                  | 0.71 [0.49, 1.02]          | 93                 | 13486                  | 0.79 [0.56, 1.13]          |
| ≥0.85                                | 80                 | 11806                  | 0.78 [0.54, 1.13]          | 125                | 18438                  | 0.83 [0.59, 1.19]          |
| Height                               |                    |                        |                            |                    |                        |                            |
| <166 cm                              | 95                 | 13642                  | 1.00 [Reference]           | 138                | 17908                  | 1.00 [Reference]           |
| 166-169 cm                           | 71                 | 9298                   | 1.09 [0.80, 1.49]          | 109                | 11853                  | 1.18 [0.92, 1.52]          |
| 170-173 cm                           | 80                 | 10236                  | 1.13 [0.84, 1.53]          | 91                 | 12822                  | 0.92 [0.71, 1.21]          |
| ≥174 cm                              | 70                 | 11212                  | 0.91 [0.66, 1.24]          | 78                 | 13308                  | 0.76 [0.58, 1.01]          |
| Location of weight gain              |                    |                        |                            |                    |                        |                            |
| Equally all over                     | 90                 | 12155                  | 1.00 [Reference]           | 108                | 15309                  | 1.00 [Reference]           |
| Waist/stomach                        | 114                | 17683                  | 0.84 [0.64, 1.11]          | 186                | 23292                  | 1.16 [0.91, 1.47]          |
| Hips/thighs                          | 96                 | 12442                  | 1.05 [0.78, 1.40]          | 102                | 14312                  | 1.01 [0.77, 1.33]          |
| Does not gain weight                 | 11                 | 1693                   | 0.85 [0.45, 1.59]          | 16                 | 2511                   | 0.91 [0.54, 1.54]          |
| Chest/shoulders                      | 5                  | 415                    | 1.06 [0.24, 4.71]          | 4                  | 467                    | 1.21 [0.40, 3.63]          |

<sup>a</sup>Frequencies and gestational weeks (GW) from the first imputation dataset

<sup>b</sup>Adjusted for maternal age, physical activity, caffeine consumption, parity, vocational training, alcohol consumption, and smoking.

Web Table 2 continued. Hazard ratios for the association between body size and SAB, stratified by parity

| Body Size Characteristics            | N SAB <sup>a</sup> | Total GW <sub>S</sub> <sup>a</sup> | Nulliparous <sup>b</sup> | N SAB <sup>a</sup> | Total GW <sub>S</sub> <sup>a</sup> | Parous <sup>b</sup> |
|--------------------------------------|--------------------|------------------------------------|--------------------------|--------------------|------------------------------------|---------------------|
| Body mass index (kg/m <sup>2</sup> ) |                    |                                    |                          |                    |                                    |                     |
| <20                                  | 69                 | 10661                              | 0.92 [0.70, 1.20]        | 39                 | 4331                               | 1.17 [0.81, 1.69]   |
| 20-24                                | 268                | 37816                              | 1.00 [Reference]         | 117                | 15143                              | 1.00 [Reference]    |
| 25-29                                | 80                 | 12647                              | 0.89 [0.69, 1.15]        | 55                 | 8047                               | 0.90 [0.65, 1.25]   |
| ≥30                                  | 56                 | 6455                               | 1.24 [0.93, 1.67]        | 48                 | 5179                               | 1.22 [0.87, 1.73]   |
| Waist circumference                  |                    |                                    |                          |                    |                                    |                     |
| <75 cm                               | 144                | 20242                              | 1.00 [Reference]         | 55                 | 5258                               | 1.00 [Reference]    |
| 75-79 cm                             | 112                | 16472                              | 0.96 [0.74, 1.26]        | 53                 | 6648                               | 0.81 [0.52, 1.27]   |
| 80-86 cm                             | 95                 | 14925                              | 0.89 [0.68, 1.18]        | 55                 | 8190                               | 0.66 [0.40, 1.08]   |
| ≥87 cm                               | 122                | 15940                              | 1.06 [0.80, 1.41]        | 96                 | 12604                              | 0.80 [0.53, 1.21]   |
| Waist to hip ratio                   |                    |                                    |                          |                    |                                    |                     |
| <0.75                                | 144                | 16632                              | 1.00 [Reference]         | 42                 | 4392                               | 1.00 [Reference]    |
| 0.75-0.79                            | 110                | 17908                              | 0.78 [0.58, 1.03]        | 65                 | 6408                               | 1.04 [0.69, 1.57]   |
| 0.80-0.84                            | 103                | 15577                              | 0.76 [0.53, 1.08]        | 63                 | 9118                               | 0.79 [0.48, 1.30]   |
| ≥0.85                                | 116                | 17462                              | 0.83 [0.62, 1.13]        | 89                 | 12782                              | 0.82 [0.55, 1.22]   |
| Height                               |                    |                                    |                          |                    |                                    |                     |
| <166 cm                              | 157                | 20732                              | 1.00 [Reference]         | 76                 | 10818                              | 1.00 [Reference]    |
| 166-169 cm                           | 109                | 14385                              | 0.99 [0.78, 1.27]        | 71                 | 6766                               | 1.45 [1.05, 2.02]   |
| 170-173 cm                           | 114                | 15929                              | 0.94 [0.73, 1.19]        | 57                 | 7129                               | 1.12 [0.79, 1.58]   |
| ≥174 cm                              | 93                 | 16533                              | 0.74 [0.57, 0.96]        | 55                 | 7987                               | 0.92 [0.65, 1.31]   |
| Location of weight gain              |                    |                                    |                          |                    |                                    |                     |
| Equally all over                     | 123                | 18133                              | 1.00 [Reference]         | 75                 | 9331                               | 1.00 [Reference]    |
| Waist/stomach                        | 193                | 27539                              | 1.02 [0.81, 1.28]        | 107                | 13436                              | 0.98 [0.73, 1.32]   |
| Hips/thighs                          | 132                | 18377                              | 1.06 [0.83, 1.36]        | 66                 | 8377                               | 0.96 [0.69, 1.34]   |
| Does not gain weight                 | 21                 | 2883                               | 1.07 [0.67, 1.70]        | 6                  | 1321                               | 0.54 [0.23, 1.25]   |
| Chest/shoulders                      | 4                  | 647                                | 0.90 [0.30, 2.71]        | 5                  | 235                                | 1.82 [0.55, 6.03]   |

<sup>a</sup>Frequencies and gestational weeks (GW) from the first imputation dataset

<sup>b</sup>Adjusted for maternal age, physical activity, caffeine consumption, parity, vocational training, alcohol consumption, and smoking.

Web Table 2 continued. Hazard ratios and 95% confidence intervals the association between body size and SAB, stratified by age

| Body Size Characteristics            | N SAB <sup>a</sup> | Total GWs <sup>a</sup> | Age <30 <sup>b</sup> | N SAB <sup>a</sup> | Total GWs <sup>a</sup> | Age ≥ 30 <sup>b</sup> |
|--------------------------------------|--------------------|------------------------|----------------------|--------------------|------------------------|-----------------------|
| Body mass index (kg/m <sup>2</sup> ) |                    |                        |                      |                    |                        |                       |
| <20                                  | 69                 | 9978                   | 1.13 [0.86, 1.49]    | 39                 | 5014                   | 0.85 [0.60, 1.21]     |
| 20-24                                | 203                | 33340                  | 1.00 [Reference]     | 182                | 19619                  | 1.00 [Reference]      |
| 25-29                                | 76                 | 12789                  | 0.98 [0.75, 1.28]    | 59                 | 7905                   | 0.80 [0.59, 1.08]     |
| ≥30                                  | 67                 | 7373                   | 1.53 [1.15, 2.03]    | 37                 | 4261                   | 0.92 [0.64, 1.32]     |
| Waist circumference                  |                    |                        |                      |                    |                        |                       |
| <75 cm                               | 123                | 17782                  | 1.00 [Reference]     | 76                 | 7718                   | 1.00 [Reference]      |
| 75-79 cm                             | 93                 | 14693                  | 0.92 [0.67, 1.26]    | 72                 | 8427                   | 0.95 [0.61, 1.48]     |
| 80-86 cm                             | 81                 | 13736                  | 0.85 [0.61, 1.19]    | 69                 | 9379                   | 0.80 [0.53, 1.20]     |
| ≥87cm                                | 118                | 17269                  | 0.99 [0.73, 1.35]    | 100                | 11275                  | 0.99 [0.64, 1.52]     |
| Waist to hip ratio                   |                    |                        |                      |                    |                        |                       |
| <0.75                                | 117                | 14489                  | 1.00 [Reference]     | 69                 | 6535                   | 1.00 [Reference]      |
| 0.75-0.79                            | 102                | 15500                  | 0.86 [0.65, 1.13]    | 73                 | 8816                   | 0.85 [0.59, 1.23]     |
| 0.80-0.84                            | 92                 | 14974                  | 0.76 [0.54, 1.08]    | 74                 | 9721                   | 0.80 [0.55, 1.15]     |
| ≥0.85                                | 104                | 18517                  | 0.82 [0.58, 1.16]    | 101                | 11727                  | 0.85 [0.56, 1.28]     |
| Height                               |                    |                        |                      |                    |                        |                       |
| <166 cm                              | 147                | 20940                  | 1.00 [Reference]     | 86                 | 10610                  | 1.00 [Reference]      |
| 166-169 cm                           | 102                | 13640                  | 1.05 [0.82, 1.36]    | 78                 | 7511                   | 1.30 [0.95, 1.77]     |
| 170-173 cm                           | 87                 | 14540                  | 0.86 [0.66, 1.12]    | 84                 | 8518                   | 1.22 [0.90, 1.65]     |
| ≥174 cm                              | 79                 | 14360                  | 0.78 [0.60, 1.03]    | 69                 | 10160                  | 0.87 [0.63, 1.20]     |
| Location of weight gain              |                    |                        |                      |                    |                        |                       |
| Equally all over                     | 113                | 17444                  | 1.00 [Reference]     | 85                 | 10020                  | 1.00 [Reference]      |
| Waist/stomach                        | 170                | 26275                  | 0.99 [0.77, 1.26]    | 130                | 14700                  | 1.05 [0.79, 1.38]     |
| Hips/thighs                          | 111                | 16591                  | 1.02 [0.78, 1.33]    | 87                 | 10163                  | 1.03 [0.76, 1.39]     |
| Does not gain weight                 | 16                 | 2648                   | 0.90 [0.53, 1.53]    | 11                 | 1556                   | 0.81 [0.43, 1.53]     |
| Chest/shoulders                      | 5                  | 522                    | 1.18 [0.36, 3.82]    | 4                  | 360                    | 1.15 [0.36, 3.69]     |

<sup>a</sup>Frequencies and gestational weeks (GW) from the first imputation dataset

<sup>b</sup>Adjusted for maternal age, physical activity, caffeine consumption, parity, vocational training, alcohol consumption, and smoking.

Web Table 2 continued. Hazard ratios and 95% confidence intervals for the association between body size and SAB, stratified cycle regularity.

| Body Size Characteristics            | N SAB <sup>a</sup> | Total GWs <sup>a</sup> | Regular Periods <sup>b</sup> | N SAB <sup>a</sup> | Total GWs <sup>a</sup> | Irregular Periods <sup>b</sup> |
|--------------------------------------|--------------------|------------------------|------------------------------|--------------------|------------------------|--------------------------------|
| Body mass index (kg/m <sup>2</sup> ) |                    |                        |                              |                    |                        |                                |
| <20                                  | 82                 | 10464                  | 1.06 [0.83, 1.36]            | 26                 | 4528                   | 0.83 [0.53, 1.30]              |
| 20-24                                | 298                | 40566                  | 1.00 [Reference]             | 87                 | 12393                  | 1.00 [Reference]               |
| 25-29                                | 107                | 15931                  | 0.91 [0.73, 1.14]            | 28                 | 4763                   | 0.83 [0.53, 1.28]              |
| ≥30                                  | 82                 | 8075                   | 1.37 [1.06, 1.76]            | 22                 | 3559                   | 0.91 [0.53, 1.47]              |
| Waist circumference                  |                    |                        |                              |                    |                        |                                |
| <75 cm                               | 154                | 18441                  | 1.00 [Reference]             | 45                 | 7059                   | 1.00 [Reference]               |
| 75-79 cm                             | 120                | 17892                  | 0.85 [0.65, 1.12]            | 45                 | 5228                   | 1.19 [0.73, 1.95]              |
| 80-86 cm                             | 119                | 17595                  | 0.83 [0.64, 1.08]            | 31                 | 5520                   | 0.77 [0.44, 1.34]              |
| ≥87cm                                | 176                | 21108                  | 1.03 [0.78, 1.35]            | 42                 | 7436                   | 0.79 [0.48, 1.29]              |
| Waist to hip ratio                   |                    |                        |                              |                    |                        |                                |
| <0.75                                | 147                | 15982                  | 1.00 [Reference]             | 39                 | 5042                   | 1.00 [Reference]               |
| 0.75-0.79                            | 132                | 18224                  | 0.85 [0.65, 1.10]            | 43                 | 6092                   | 0.88 [0.56, 1.36]              |
| 0.80-0.84                            | 126                | 18587                  | 0.77 [0.56, 1.06]            | 40                 | 6108                   | 0.73 [0.42, 1.24]              |
| ≥0.85                                | 164                | 22243                  | 0.86 [0.63, 1.18]            | 41                 | 8001                   | 0.65 [0.40, 1.07]              |
| Height                               |                    |                        |                              |                    |                        |                                |
| <166 cm                              | 185                | 23322                  | 1.00 [Reference]             | 48                 | 8228                   | 1.00 [Reference]               |
| 166-169 cm                           | 135                | 16124                  | 1.04 [0.83, 1.31]            | 45                 | 5027                   | 1.47 [0.97, 2.22]              |
| 170-173 cm                           | 136                | 17401                  | 0.98 [0.78, 1.22]            | 35                 | 5657                   | 1.00 [0.64, 1.56]              |
| ≥174 cm                              | 113                | 18189                  | 0.78 [0.61, 0.98]            | 35                 | 6331                   | 0.94 [0.60, 1.46]              |
| Location of weight gain              |                    |                        |                              |                    |                        |                                |
| Equally all over                     | 147                | 20481                  | 1.00 [Reference]             | 51                 | 6983                   | 1.00 [Reference]               |
| Waist/stomach                        | 245                | 29795                  | 1.12 [0.91, 1.37]            | 55                 | 11180                  | 0.70 [0.48, 1.04]              |
| Hips/thighs                          | 147                | 20804                  | 0.99 [0.79, 1.25]            | 51                 | 5950                   | 1.16 [0.78, 1.73]              |
| Does not gain weight                 | 22                 | 3277                   | 0.92 [0.59, 1.44]            | 5                  | 927                    | 0.78 [0.31, 1.97]              |
| Chest/shoulders                      | 8                  | 679                    | 1.38 [0.55, 3.46]            | 1                  | 203                    | 0.57 [0.07, 4.52]              |

<sup>a</sup>Frequencies and gestational weeks (GW) from the first imputation dataset

<sup>b</sup>Adjusted for maternal age, physical activity, caffeine consumption, parity, vocational training, alcohol consumption, and smoking.
